# Supplementary material for: Social conformity is a heuristic when individual risky decision-making is disrupted
Source: PubMed Central journal article supplement (PMC11651703; doi:10.1371/journal.pcbi.1012602), 2024-12-02
Supplement: pcbi.1012602.s004.pdf [file pcbi.1012602.s004.pdf]

**a**Model fits  
(iBIC)

|           |                      |                      |      |           |      |  |
|-----------|----------------------|----------------------|------|-----------|------|--|
| Fit model | OCU-free             | 4727                 | 4940 | 4908      | 4526 |  |
|           | OCU-based            | 4983                 | 3953 | 3985      | 5081 |  |
|           | Solo risk preference | 5286                 | 3947 | 4028      | 5611 |  |
|           | Hybrid               | 4606                 | 4000 | 4032      | 4533 |  |
|           |                      | Hybrid               |      | OCU-based |      |  |
|           |                      | Solo risk preference |      | OCU-free  |      |  |
|           |                      | Simulated model      |      |           |      |  |

**b**Confusion matrix:  
 $p(\text{fit model} \mid \text{simulated model})$ 

|           |                      |                      |     |           |     |  |
|-----------|----------------------|----------------------|-----|-----------|-----|--|
| Fit model | OCU-free             | 39%                  | 16% | 16%       | 52% |  |
|           | OCU-based            | 14%                  | 30% | 45%       | 16% |  |
|           | Solo risk preference | 7%                   | 34% | 30%       | 0%  |  |
|           | Hybrid               | 41%                  | 20% | 9%        | 32% |  |
|           |                      | Hybrid               |     | OCU-based |     |  |
|           |                      | Solo risk preference |     | OCU-free  |     |  |
|           |                      | Simulated model      |     |           |     |  |

**c**Inversion matrix:  
 $p(\text{simulated model} \mid \text{fit model})$ 

|           |                      |                      |     |           |     |  |
|-----------|----------------------|----------------------|-----|-----------|-----|--|
| Fit model | OCU-free             | 31%                  | 13% | 13%       | 43% |  |
|           | OCU-based            | 13%                  | 28% | 43%       | 15% |  |
|           | Solo risk preference | 10%                  | 48% | 42%       | 0%  |  |
|           | Hybrid               | 40%                  | 20% | 9%        | 31% |  |
|           |                      | Hybrid               |     | OCU-based |     |  |
|           |                      | Solo risk preference |     | OCU-free  |     |  |
|           |                      | Simulated model      |     |           |     |  |
