# Supplementary material for: Social conformity is a heuristic when individual risky decision-making is disrupted
Source: PubMed Central journal article supplement (PMC11651703; doi:10.1371/journal.pcbi.1012602), 2024-12-02

Percent safe choices  
in COM INFO – SOLO trials

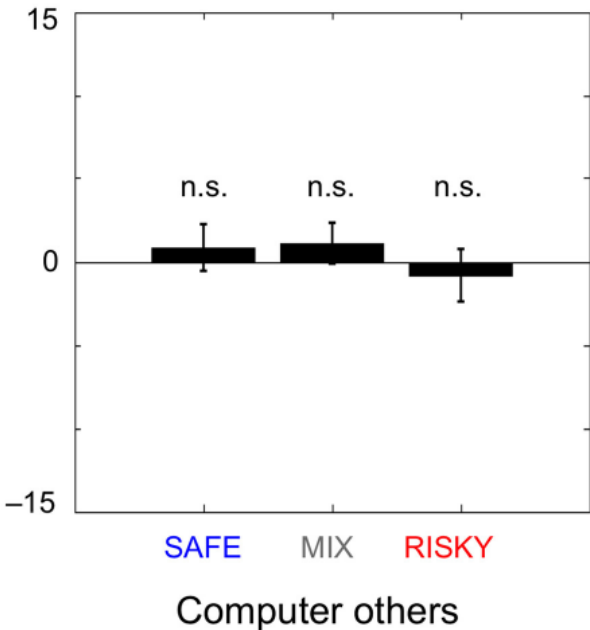

Supplement: pcbi.1012602.s008.pdf [file pcbi.1012602.s008.pdf]
